# Supplementary material
Source: publisher site journal article supplement (https://www.dovepress.com/article/506443)
Supplement: Supplementary file 1 [file get_supplementary_file.php]

**
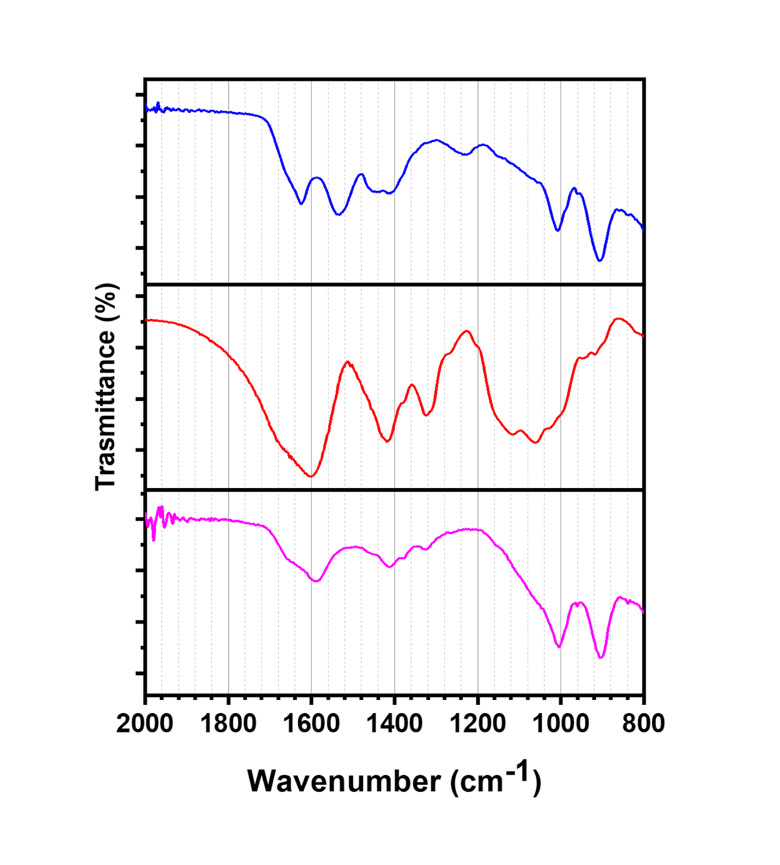
**

**Figure S1:** Enlargement of the 800-2000 cm-1 region of the FTIR spectra of bare M55 NPs (blue line), o-carboxymethyl chitosan (red line) and CM55 (pink line).


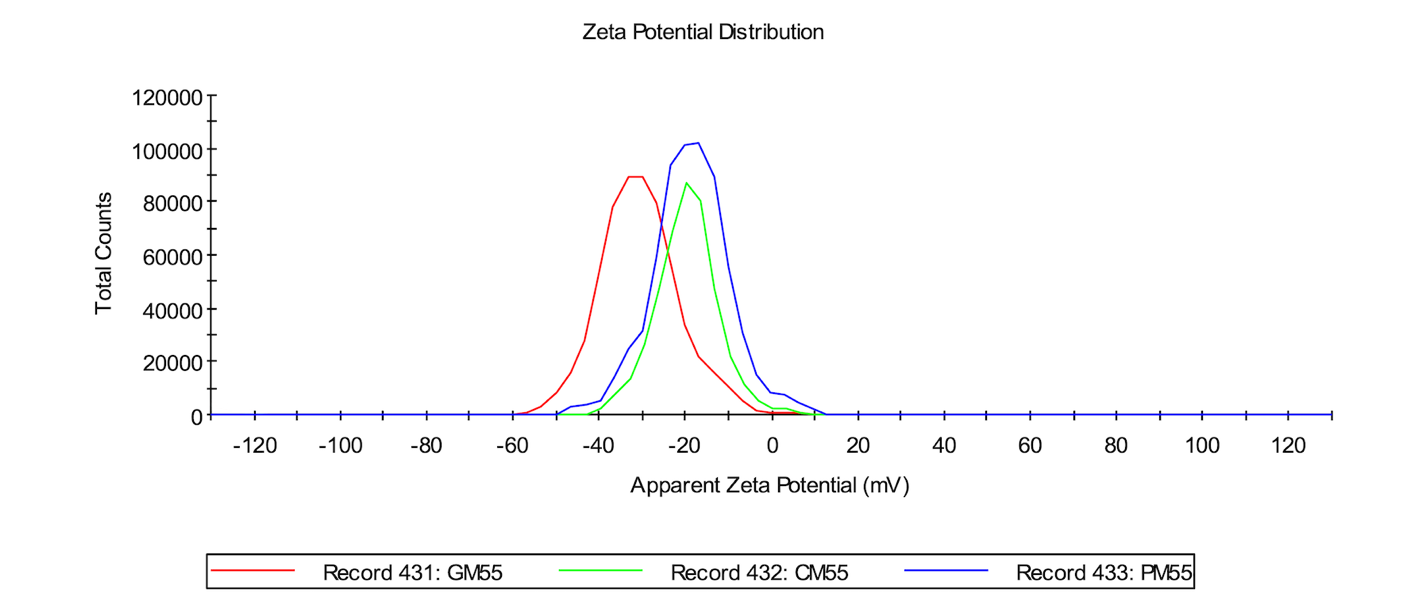


**Figure S2:** Zeta potential measurements of GM55 (red), CM55 (green), and PM55 (blue).


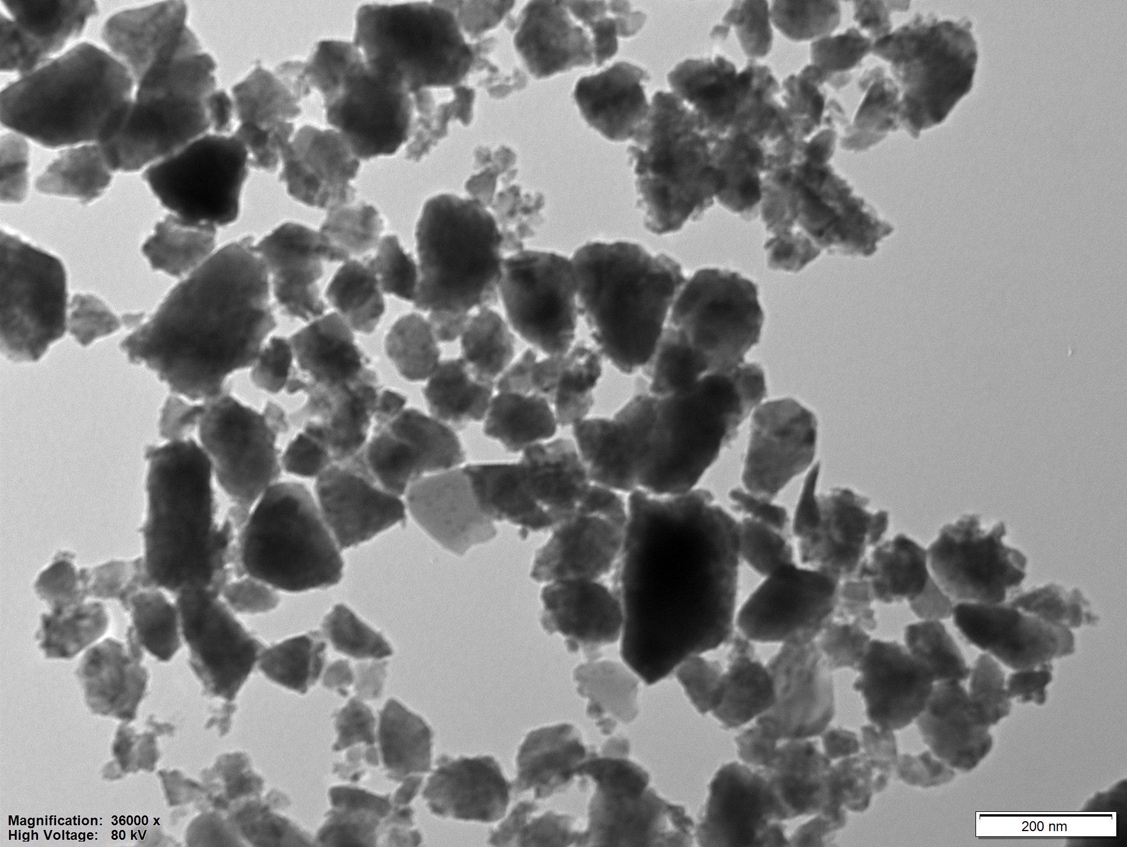


**Figure S3:** TEM image of M55, with scale bar = 200 nm.


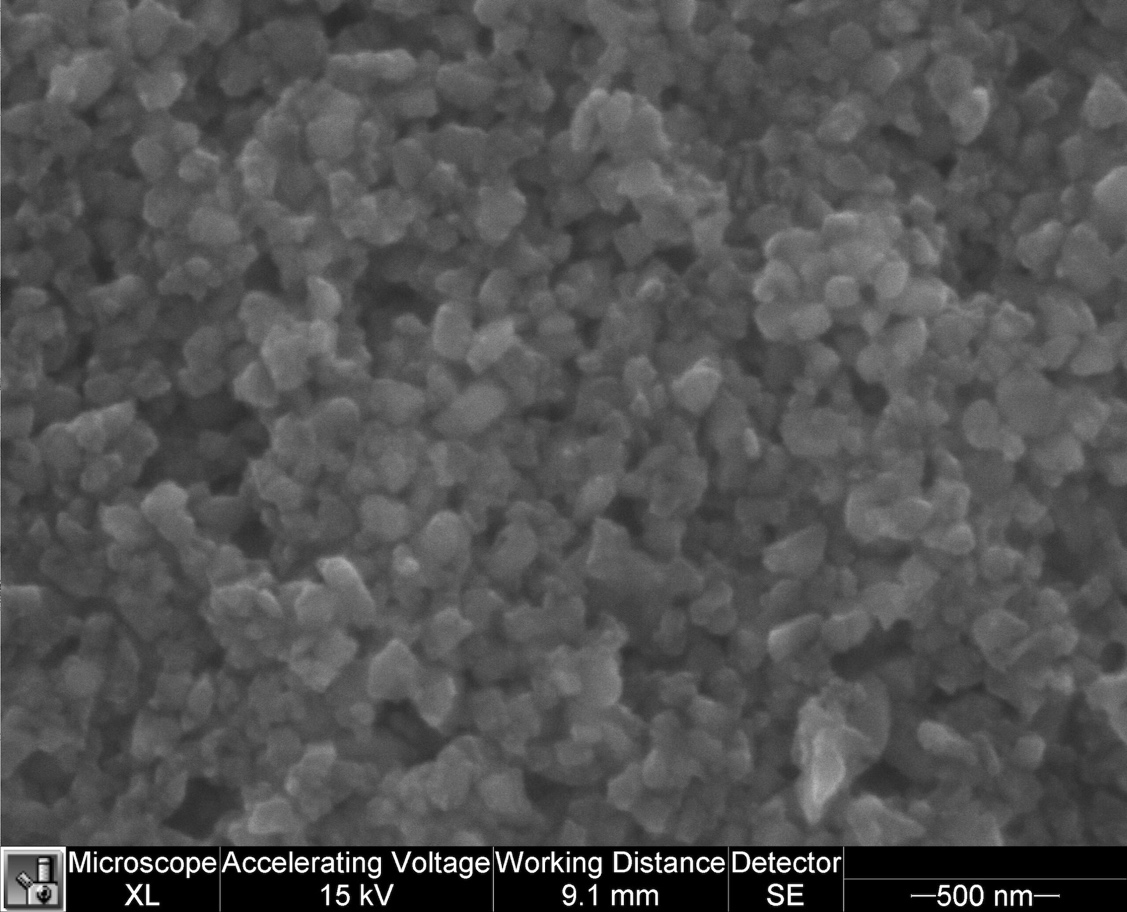


**Figure S4:** SEM image of M55, with scale bar = 500 nm.

**
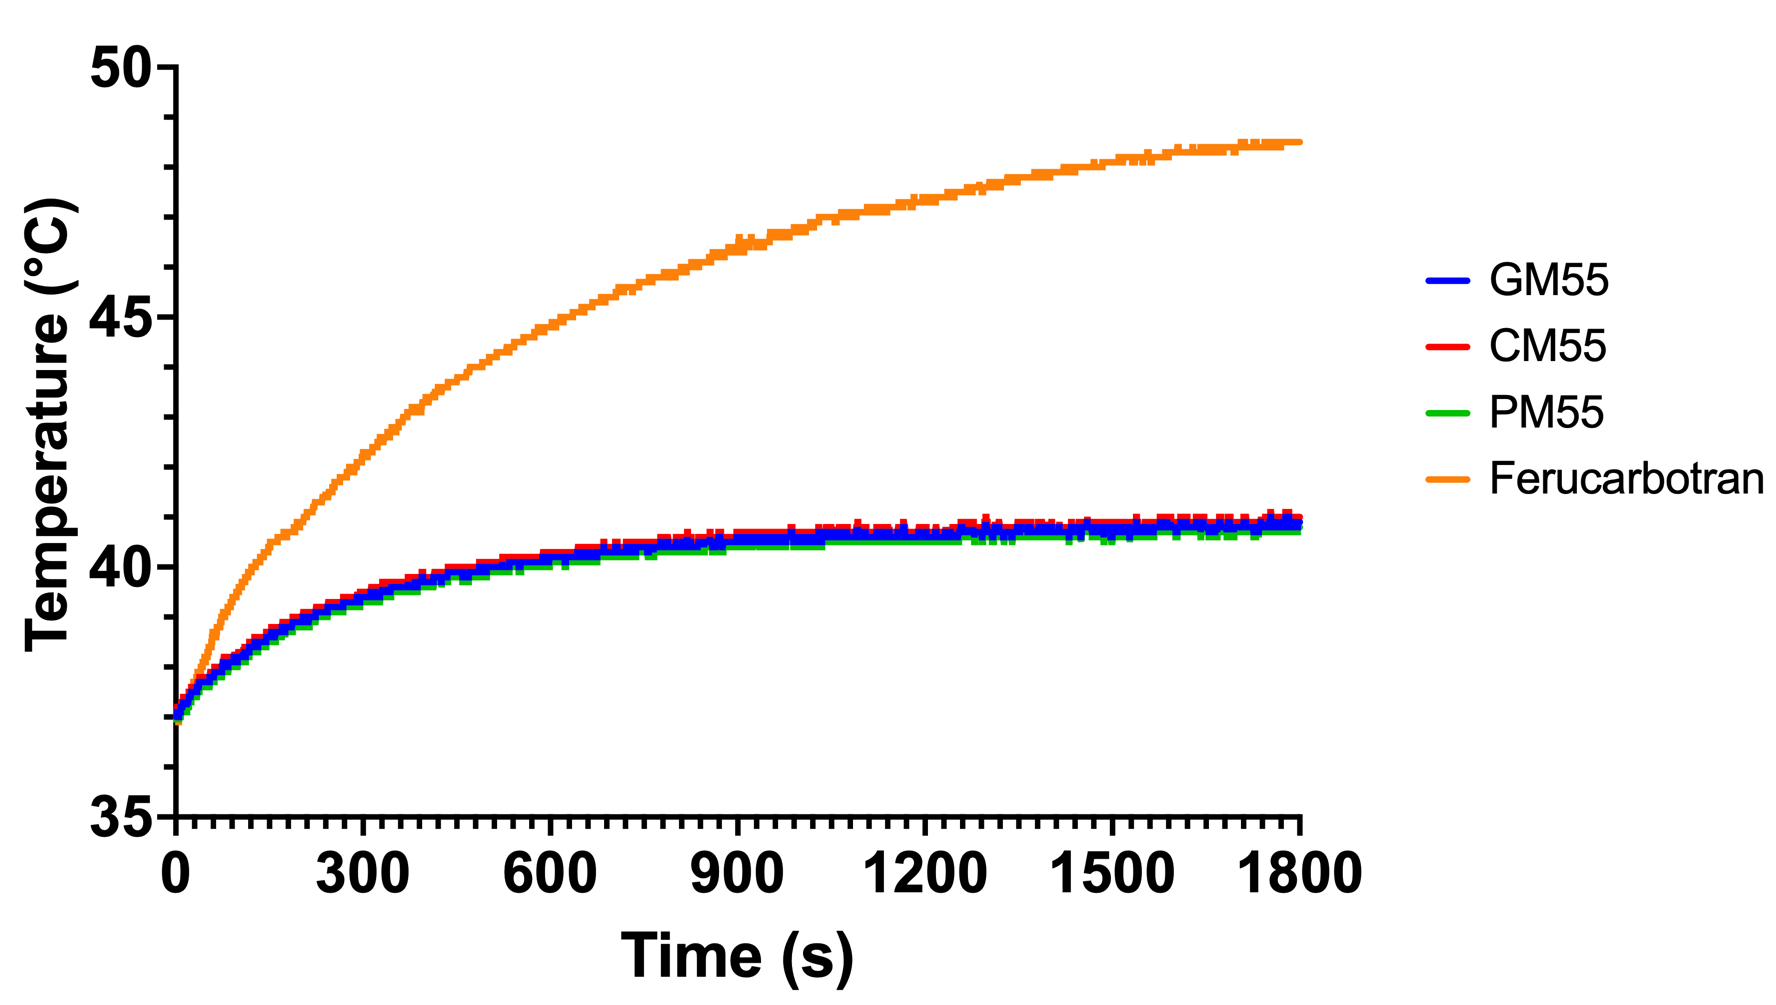
**

**Figure S5:** Thermograms of water-dispersed GM55, CM55, PM55, and Ferucarbotran under AMF application.


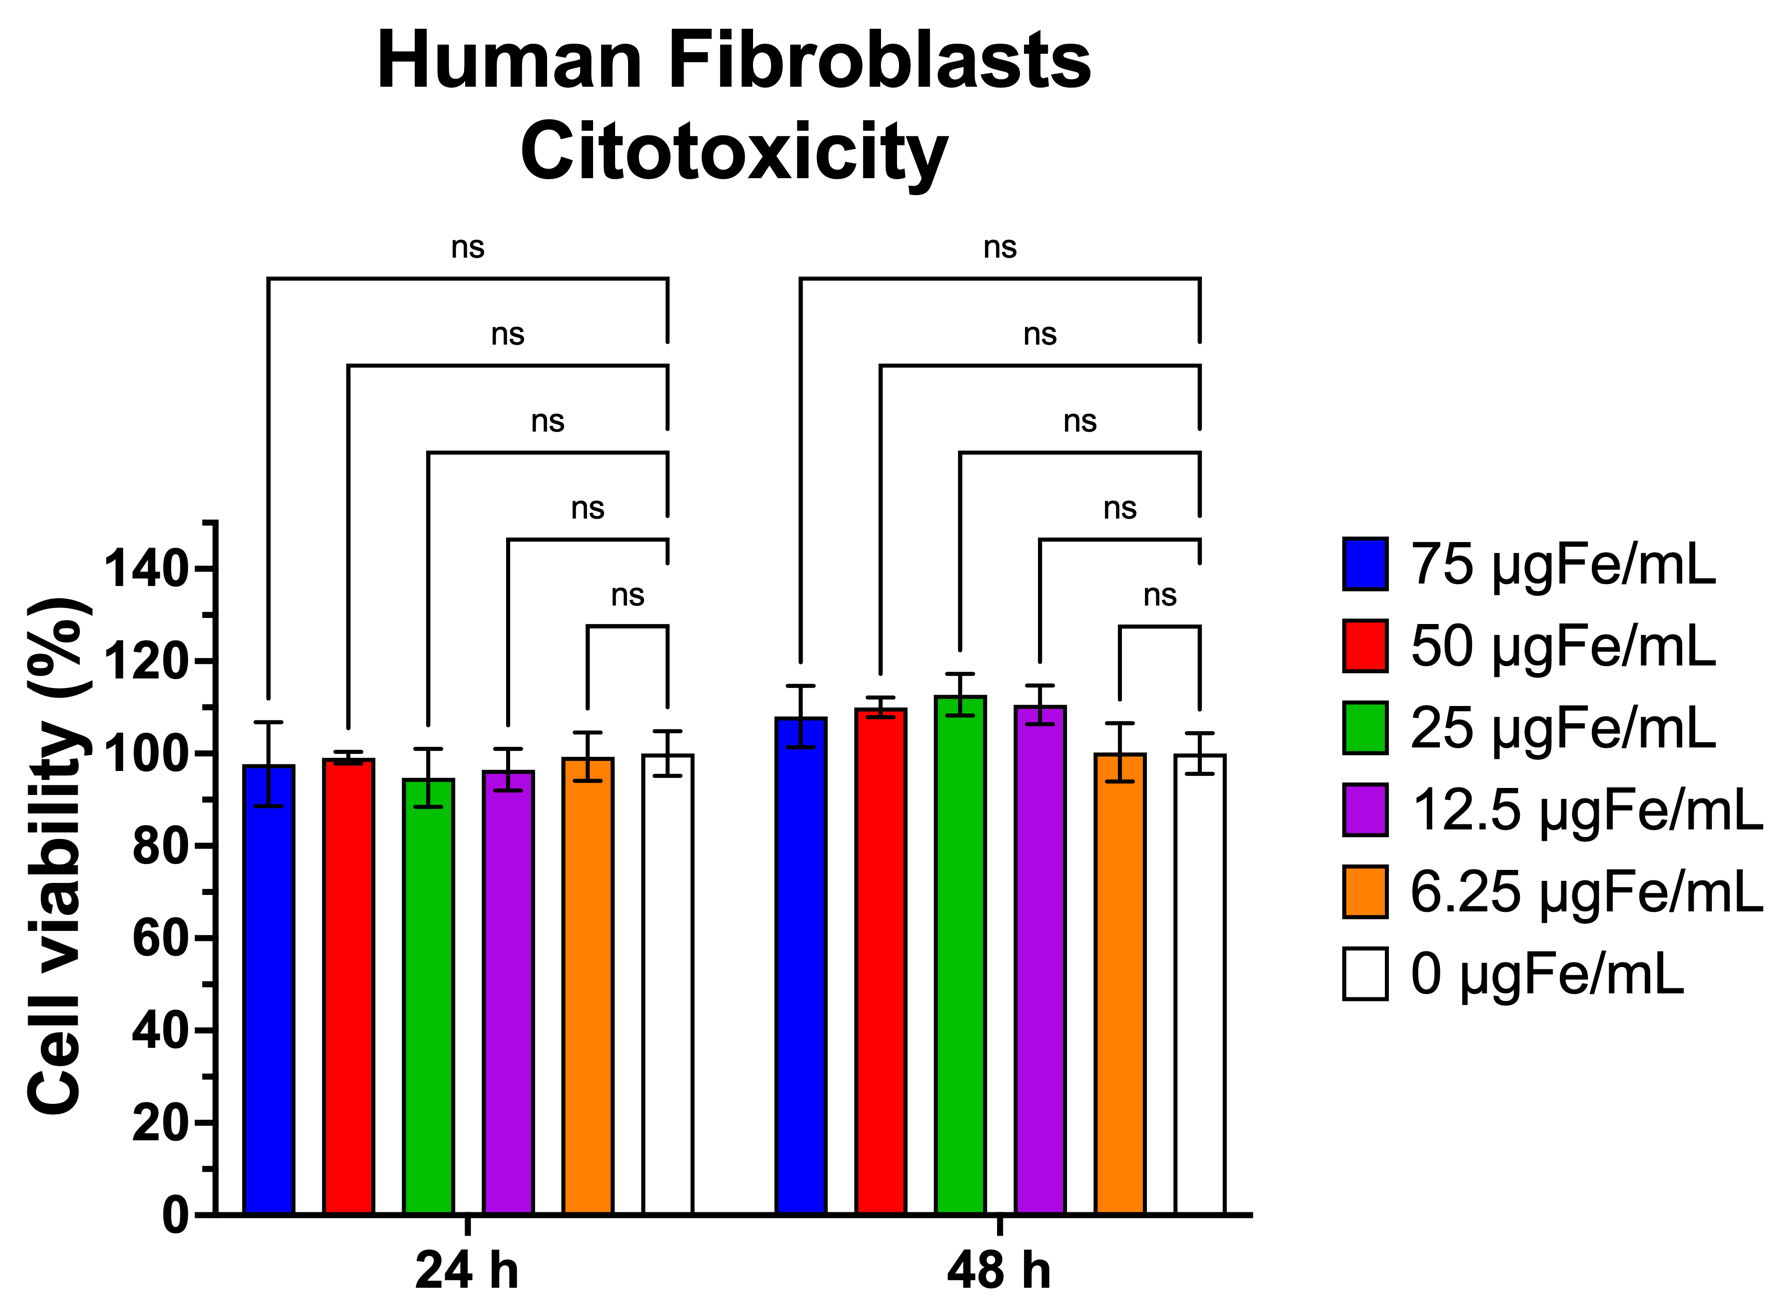


**Figure S6:** Cell viability assessed on WI-26 Human Fibroblast after 24 hours and 48 hours of incubation with GM55 NPs at different concentrations.
